# Supplementary material for: Immunogenic epitope panel for accurate detection of non-cross-reactive T cell response to SARS-CoV-2
Source: JCI journal article supplement (doi:10.1172/jci.insight.157699), 2022-04-07
Supplement: sd1 [file 1]

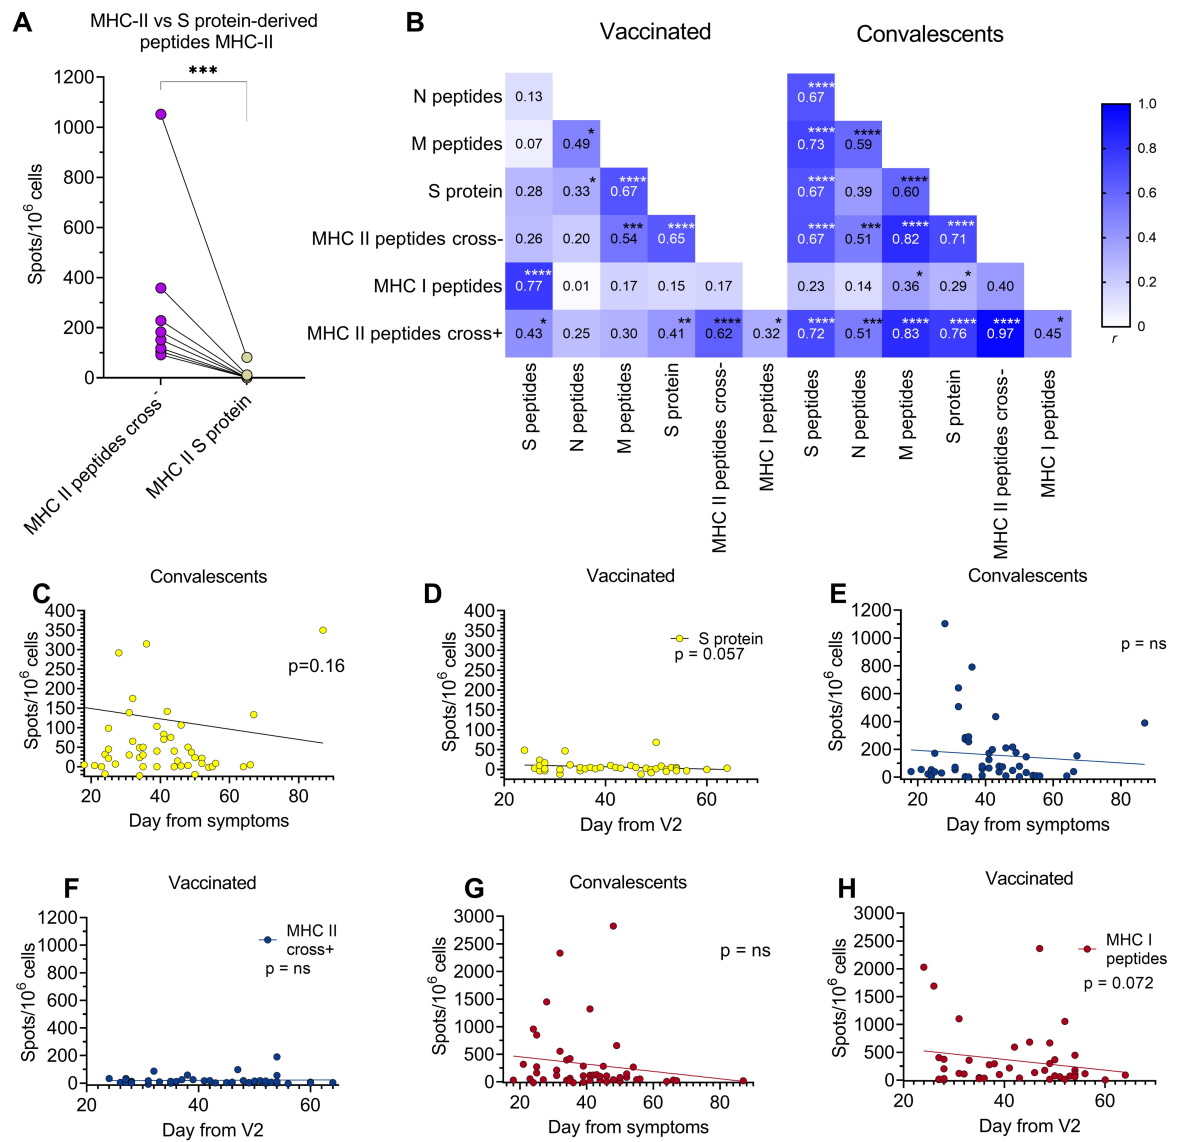

**Figure S2.** (A) Difference in response to MHC-II peptides versus S protein-derived MHC-II peptides (Wilcoxon test,  $p=0.002$ ). (B) Correlation between responses to different antigens in Vac and CP (Spearman correlation, \* $p < 0.05$ , \*\* $p < 0.01$ , \*\*\* $p < 0.001$ , \*\*\*\* $p < 0.0001$ ). (C–H) Influence on time elapsed from symptoms or boost vaccination (V2) on the magnitude of response to recombinant S protein in CP (C) and Vac (D), MHC-II peptides in CP (E) and Vac (F), and MHC-I peptides in CP (G) and Vac (H) (linear regression).

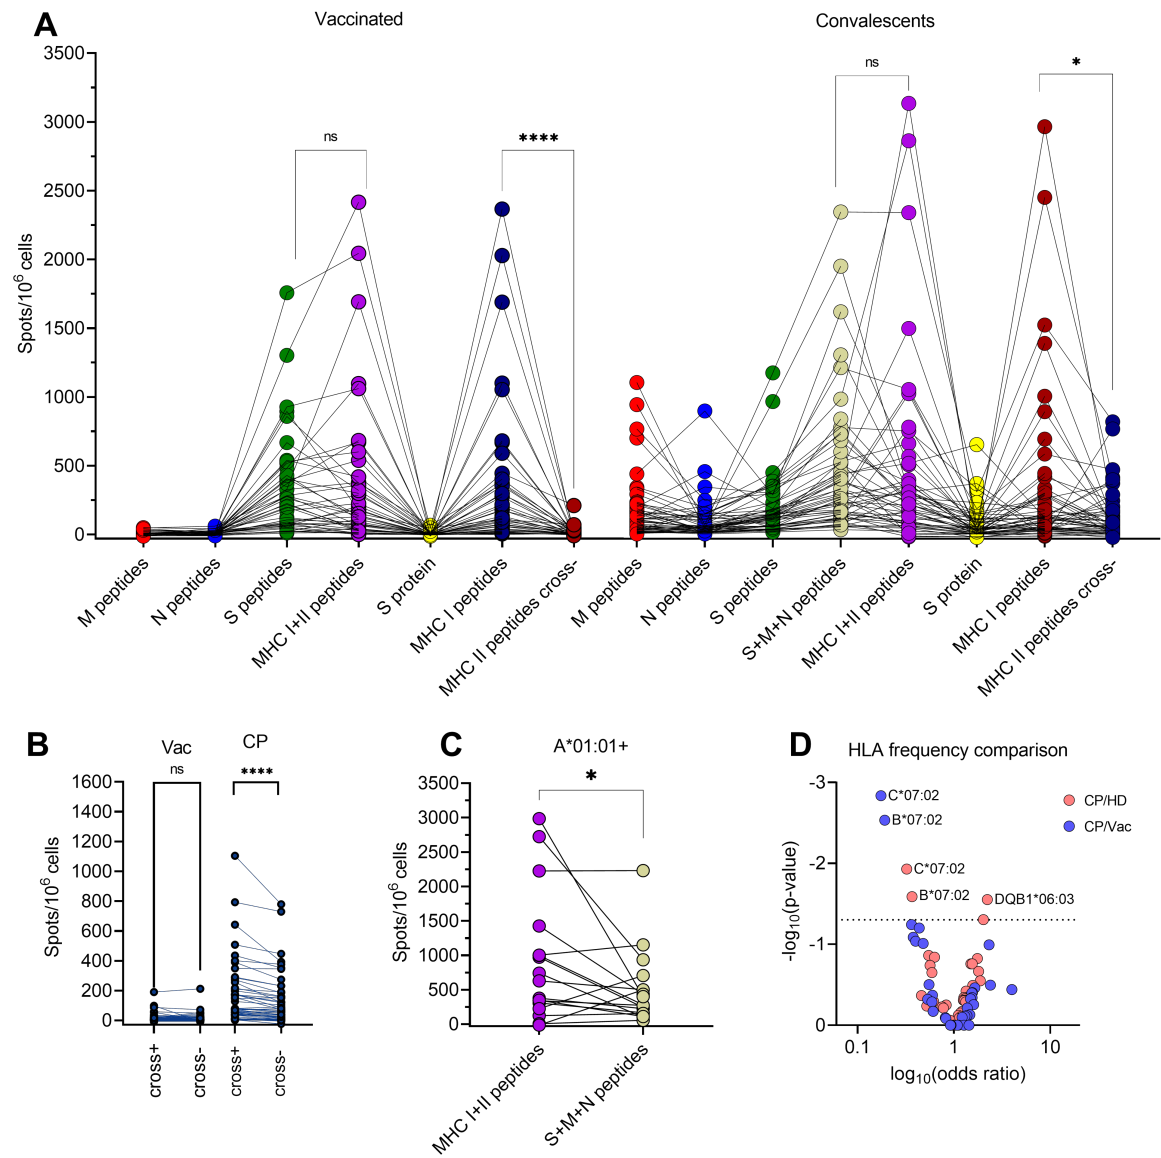

**Figure S3.** (A) Response to antigens and peptide sets grouped by individuals. (B) Difference in responses to MHC-II peptides before and after exclusion of two cross-reactive peptides (Wilcoxon test, \*\*\*\* $p < 0.0001$ , \* $p = 0.038$ ) (C) Response to antigens among A\*01:01+ convalescents (Wilcoxon test,  $p = 0.046$ ). (D) Volcano plot shows the difference between HLA allele frequencies in groups. The x-axis denotes the decimal logarithm of the odds ratio of the given allele carriers and non-carriers between different cohorts (HD - bone marrow donors,  $n = 2210$ ). Y-axis denotes the negative decimal logarithm of the p-value. P-value = 0.05 is depicted by the dotted line (Fisher exact test, statistically significant values are annotated).

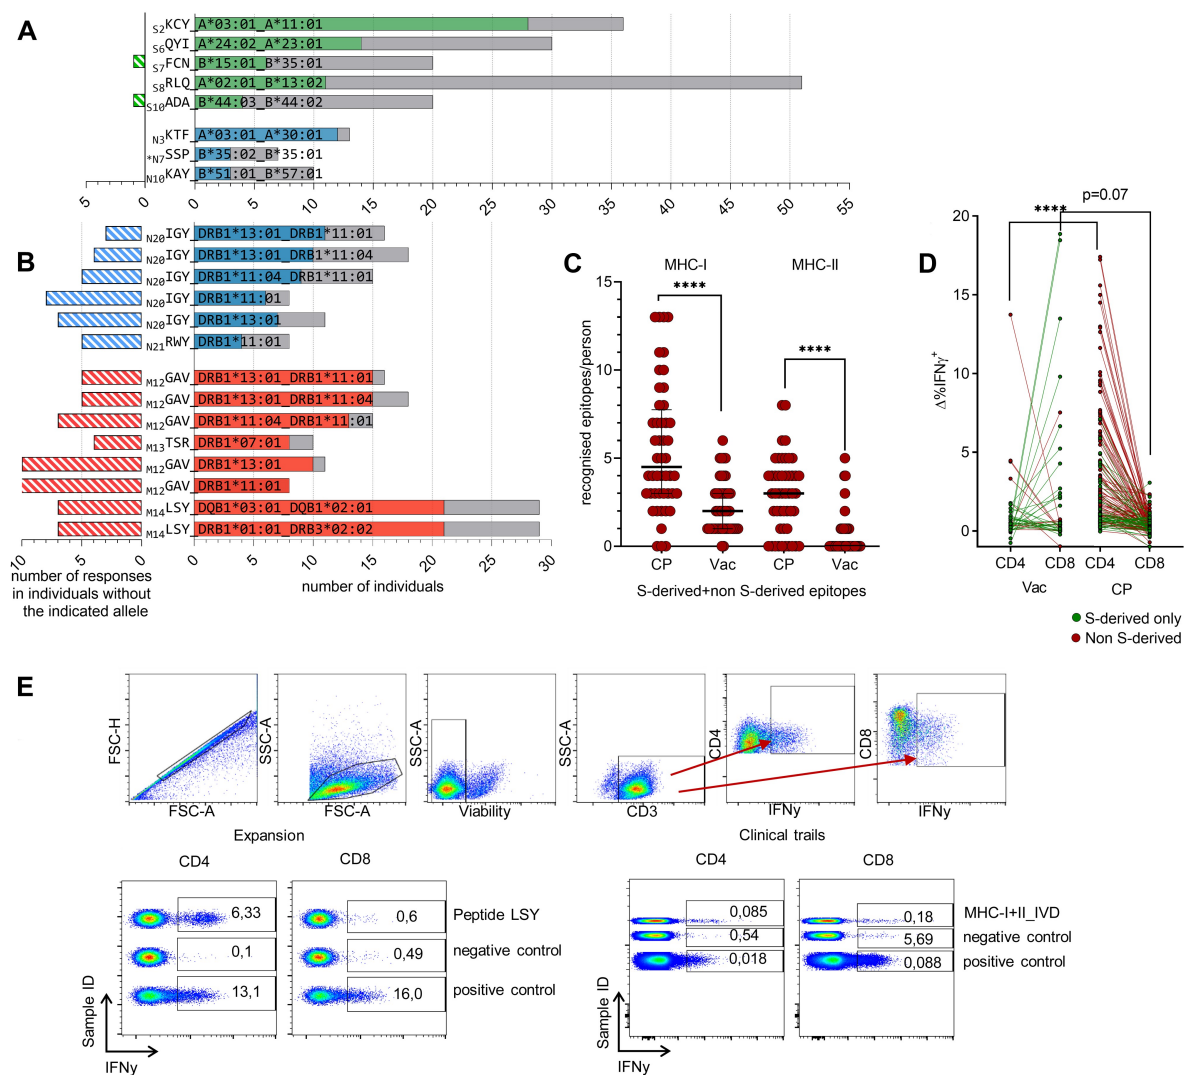

**Figure S4.** (A, B) Number of responses to each peptide in individuals with (right) or without (left) the indicated (A) HLA-I or (B) -II alleles. Data are presented as in **Figure 3A, B**. (C) Number of any protein-derived MHC-I and MHC-II epitopes recognized per individual for the CP and Vac cohorts. (D) Flow cytometric analysis of the phenotype of T cells responding to MHC-II peptides after *ex vivo* expansion. Plot shows the difference in the % of CD4<sup>+</sup> or CD8<sup>+</sup> IFN $\gamma$ <sup>+</sup> T cells between peptide-stimulated cells and negative controls. Mann-Whitney test, \*\*\*\*p<0.0001 (E) Gating strategy for expansion (**Fig. S4D**) and clinical trial (**Fig. S6A-B**) flow cytometry data and representative cytometry plots for expansion (bottom left, response to LSY peptide, negative and positive control) and clinical trial (bottom right, response to the MHC-I+II\_IVD mix, negative and positive control).

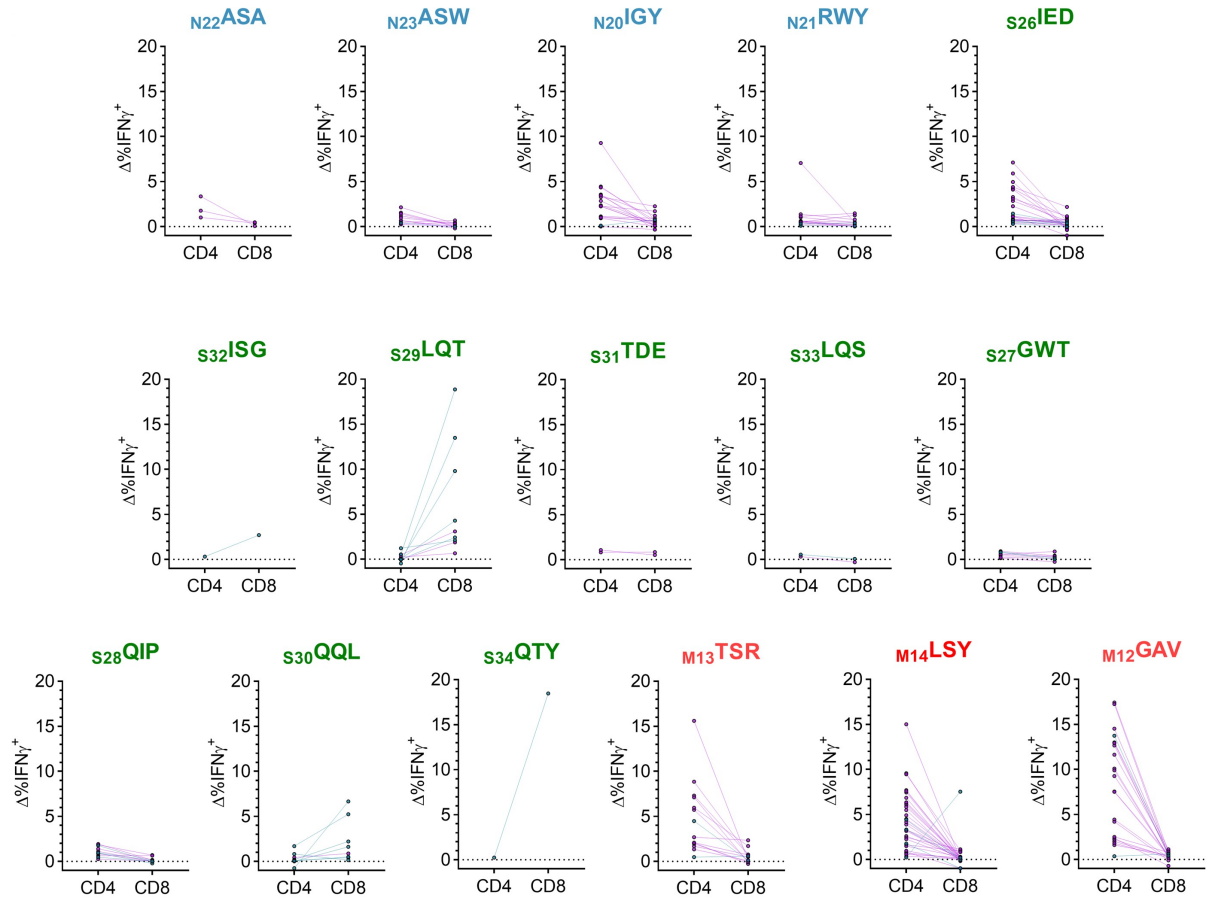

**Figure S5.** Flow cytometric analysis of the phenotype of *ex-vivo* expanded T cells responding to MHC-II peptides for each peptide (antigens labeled green for S, red for M, and blue for N) in Vac (blue) and CP donors (rose). Plots show differences in the % of CD4 or CD8 IFN $\gamma$ + T cells after *ex-vivo* expansion between peptide-stimulated cells and negative controls.

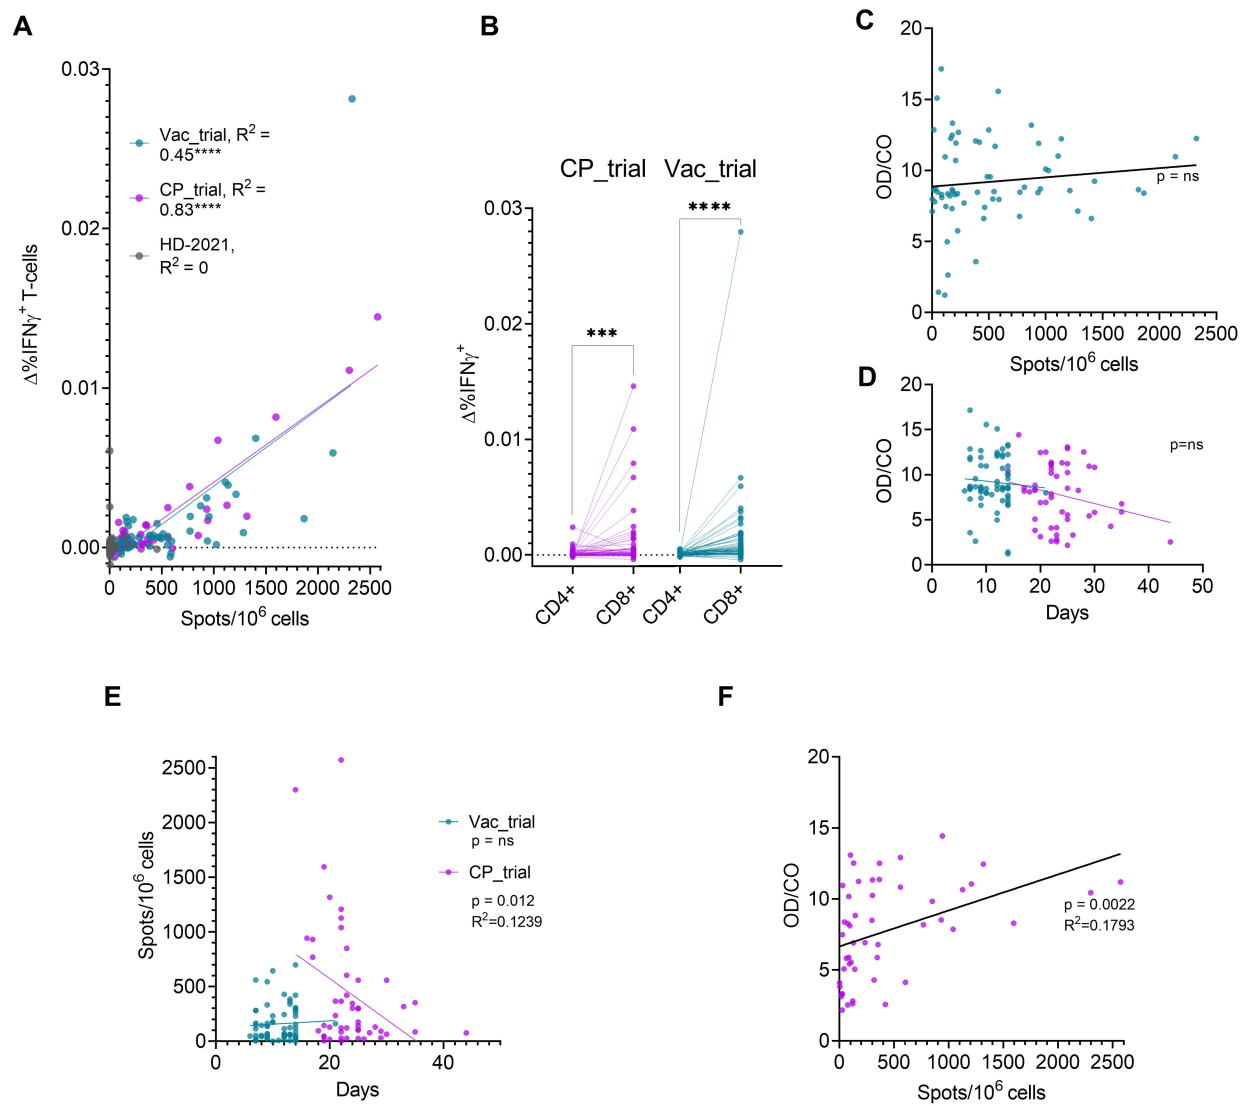

**Figure S6.** (A) Scatter plot shows response of Vac\_trial ( $n = 60$ ), CP\_trial ( $n = 48$ ), and HD-2021 ( $n = 88$ ) cohorts (only donors with available flow cytometry data are shown) as measured by Corona-T-test (number of spots; x-axis) versus flow cytometry (sum of  $\%CD4^+ IFN\gamma^+$  and  $\%CD8^+ IFN\gamma^+$  after subtracting background; y-axis). Linear regression, F-statistic,  $****p < 0.0001$ . (B) Impact of  $CD4^+$  and  $CD8^+$  on the total response. Plot shows the difference between the peptide-stimulated PBMC and negative control in  $IFN\gamma^+$  cells gated as  $CD4^+$  or  $CD8^+$  cells. Wilcoxon test,  $***p = 0.0009$ ,  $****p < 0.0001$  (C) Correlation between Corona-T-test response and time since V2 (boost vaccination) in Vac\_trial individuals. (D, E) Correlation between time since V2 in Vac\_trial or disease onset in CP-trial and (D) humoral or (E) T cell response. (F) Correlation between Corona-T-test response and time since disease onset in convalescents. OD/CO represent the ratio of  $OD_{450}$  of the sample to the test cut-off.

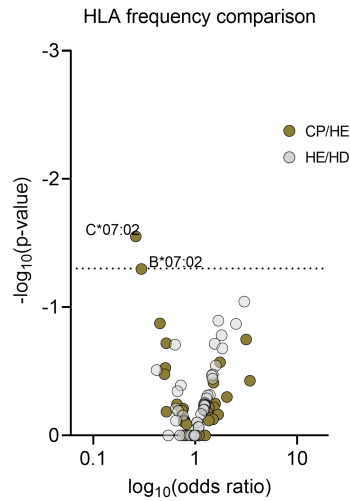

**Figure S7.** Volcano plot shows the difference between HLA allele frequencies in the cohorts. The x-axis denotes the decimal logarithm of the odds ratio of the given allele carriers and non-carriers between different cohorts (HE = healthy exposed, CP = convalescents, HD = bone marrow donors, n=2210). Y-axis denotes the negative decimal logarithm of the p-value. P-value = 0.05 is depicted by the dotted line (Fisher exact test; statistically significant values are annotated).
